# Supplementary material
Source: MDPI journal article supplement (https://www.mdpi.com/2073-4433/13/3/427)
Supplement: s1 [file s1]

# Supplementary Materials: Spatial Distribution of Aerosol Characteristics over the South Atlantic and Southern Ocean Using Multiyear (2004–2021) Measurements from Russian Antarctic Expeditions

Sergey M. Sakerin <sup>1</sup>, Liudmila P. Golobokova <sup>2</sup>, Dmitry M. Kabanov <sup>1</sup>, Olga I. Khuriganowa <sup>1,2</sup>, Viktor V. Pol'kin <sup>1</sup>, Vladimir F. Radionov <sup>3</sup>, Olga R. Sidorova <sup>3</sup> and Yuri S. Turchinovich <sup>1</sup>

**Table S1.** Number of days of the measurements of different characteristics and collected aerosol samples (*n*) in the latitude zone of 34°S – 70°S of the Indo-Atlantic sector of the ocean (45°W – 110°E).

| No                   | Name of Expedition and Research Vessel             | AOD | <i>N<sub>a</sub></i> /EBC | Samples ( <i>n</i> ) |
|----------------------|----------------------------------------------------|-----|---------------------------|----------------------|
| 1                    | 19-th cruise <i>Akademik Sergey Vavilov</i> , 2004 | 7   | 21/17                     | 12                   |
| 2                    | 51 RAE, <i>Akademik Fedorov</i> , 2005/2006        | 19  | –                         | –                    |
| 3                    | 52 RAE, <i>Akademik Fedorov</i> , 2006/2007        | 50  | 13/45                     | 22                   |
| 4                    | 53 RAE, <i>Akademik Fedorov</i> , 2007/2008        | 42  | 83/77                     | 40                   |
| 5                    | 54 RAE, <i>Akademik Fedorov</i> , 2008/2009        | 27  | –                         | –                    |
| 6                    | 55 RAE, <i>Akademik Fedorov</i> , 2009/2010        | 20  | 39/40                     | 23                   |
| 7                    | 56 RAE, <i>Akademik Fedorov</i> , 2010/2011        | 29  | 14/14                     | –                    |
| 8                    | 57 RAE, <i>Akademik Fedorov</i> , 2012             | 33  | 42/41                     | –                    |
| 9                    | 58 RAE, <i>Akademik Fedorov</i> , 2012/2013        | 59  | 64/70                     | 8                    |
| 10                   | 59 RAE, <i>Akademik Fedorov</i> , 2013/2014        | 14  | 55/55                     | 13                   |
| 11                   | 59 RAE, <i>Akademik Tryoshnikov</i> , 2014         | 11  | –                         | 23                   |
| 12                   | 60 RAE, <i>Akademik Fedorov</i> , 2014/2015        | 47  | 95/98                     | 55                   |
| 13                   | 61 RAE, <i>Akademik Fedorov</i> , 2015/2016        | 38  | –                         | –                    |
| 14                   | 62 RAE, <i>Akademik Fedorov</i> , 2016/2017        | 54  | 67/2                      | 40                   |
| 15                   | 62 RAE, <i>Akademik Tryoshnikov</i> , 2016/2017    | 23  | 40/42                     | 17                   |
| 16                   | 63 RAE, <i>Akademik Fedorov</i> , 2017/2018        | 7   | 61/71                     | –                    |
| 17                   | 64 RAE, <i>Akademik Fedorov</i> , 2018/2019        | 5   | 95/–                      | 25                   |
| 18                   | 65 RAE, <i>Akademik Tryoshnikov</i> , 2019/2020    | 16  | 18/22                     | 13                   |
| 19                   | 65 RAE, <i>Akademik Fedorov</i> , 2020             | 14  | 43/47                     | –                    |
| 20                   | 66 RAE, <i>Akademik Tryoshnikov</i> , 2020/2021    | 21  | –                         | –                    |
| Total amount of data |                                                    | 536 | 746/644                   | 291                  |

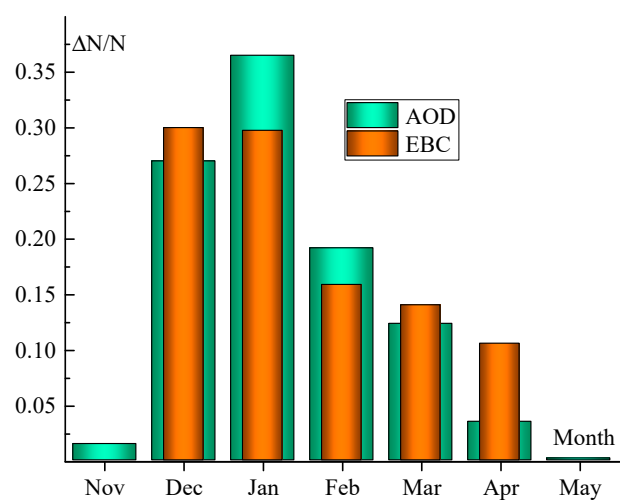

**Figure S1.** Histograms of data distribution by months of measurements.
